# Supplementary material for: Rational design of a self-supporting skeleton decorated with dual lithiophilic Sn-containing and N-doped carbon tubes for dendrite-free lithium metal anodes
Source: Royal Society of Chemistry journal article supplement (doi:10.1039/d2ta00601d), 2022-01-01
Supplement: d2ta00601d1.pdf [file d2ta00601d1.pdf]

## Supporting Information

### **Rational Design of a Self-Supporting Skeleton Decorated with Dual Lithiophilic Sn-Containing and N-Doped Carbon Tubes for Dendrite-free Lithium Metal Anode**

*Jiaxiao Ge,<sup>a†</sup> Jie Hong,<sup>a†</sup> Tiancun Liu<sup>ab\*</sup> and Yong Wang<sup>ac\*</sup>*

*<sup>a</sup>Department of Chemical Engineering, School of Environmental and Chemical Engineering, Shanghai University, 99 Shangda Road, Shanghai 200444, People's Republic of China*

*<sup>b</sup>School of Materials Science and Engineering, Zhejiang Sci-Tech University, Hangzhou 310018, People's Republic of China, Email address: liutc@zstu.edu.cn*

*<sup>c</sup>Key Laboratory of Organic Compound Pollution Control Engineering (MOE), Shanghai University, 99 Shangda Road, Shanghai 200444, People's Republic of China, Email address: yongwang@shu.edu.cn*

*†*These authors contributed equally to this work.

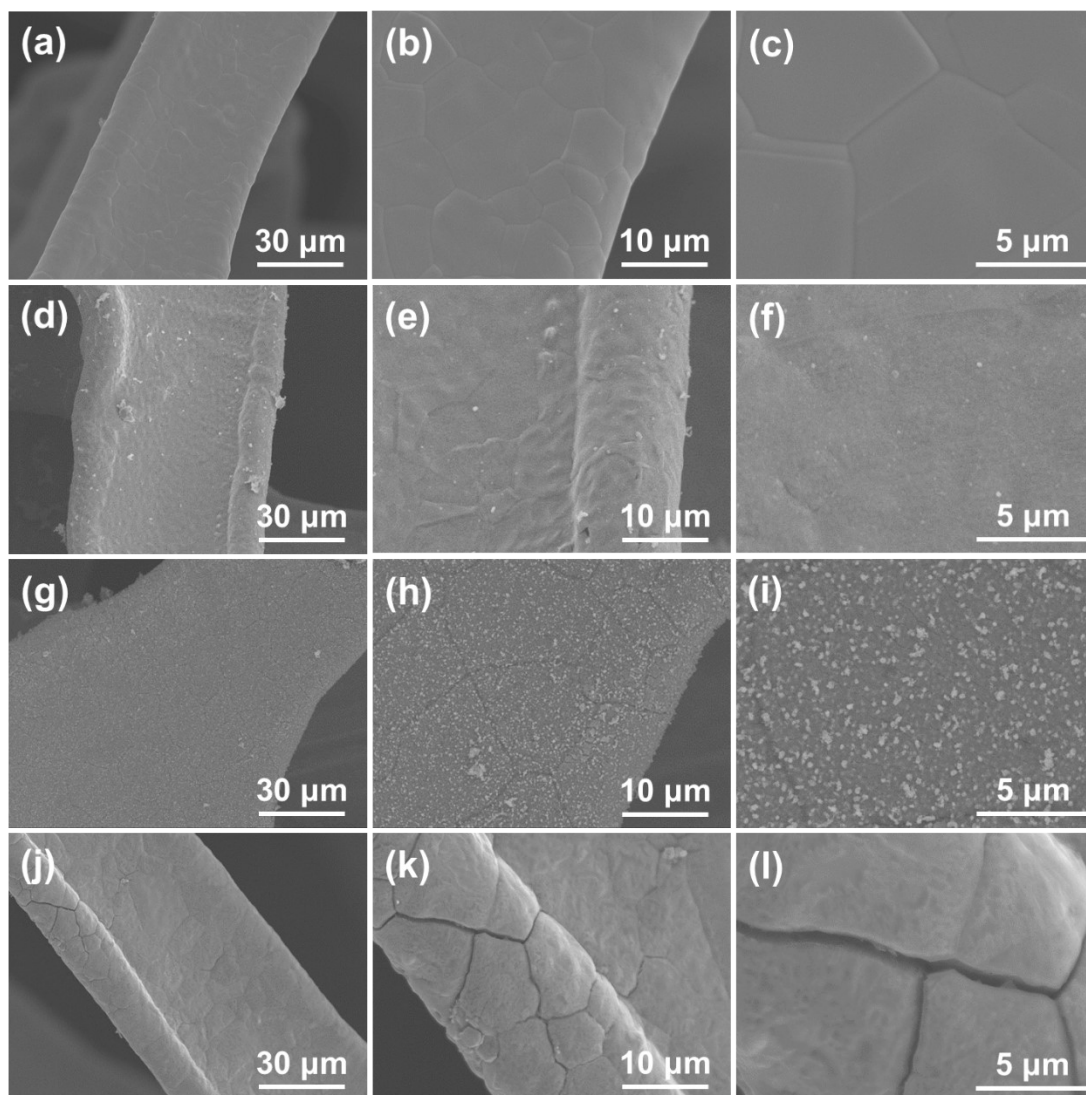

**Fig. S1.** SEM images of (a-c) NF, (d-f) precursor, (g-i) NF@Sn/C and (j-l) NF@C at different magnifications.

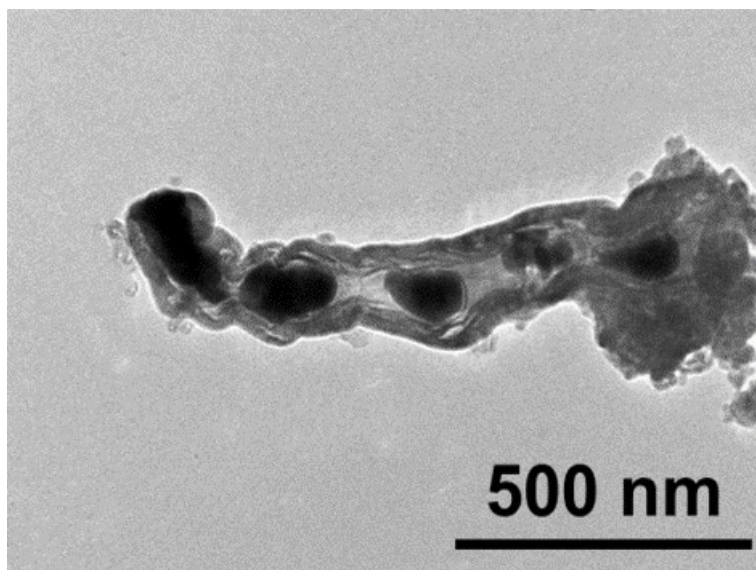

**Fig. S2.** TEM image of DLCTs with the bamboo-like structure and visible Sn particles.

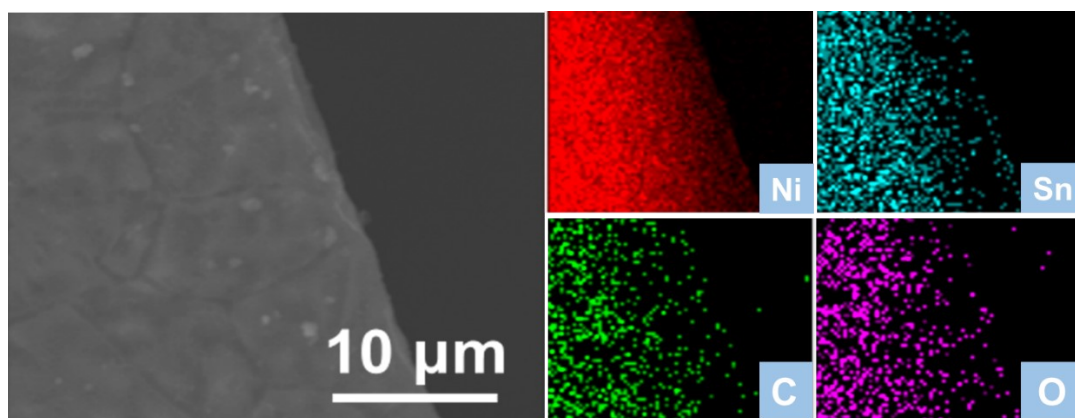

**Fig. S3.** Elemental mapping images of the precursor. It can be clearly observed that there are homogeneous distributions of Ni, Sn, C and O elements in the precursor.

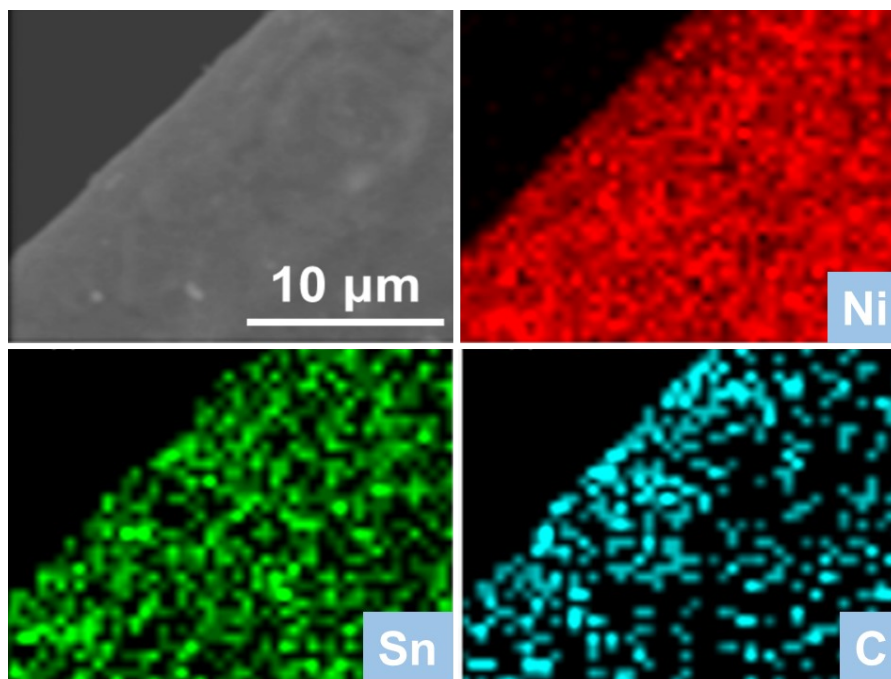

**Fig. S4.** Elemental mapping images of the as-prepared NF@Sn/C. Specially, there are homogeneous distributions of Ni, Sn and C elements in the as-prepared NF@Sn/C.

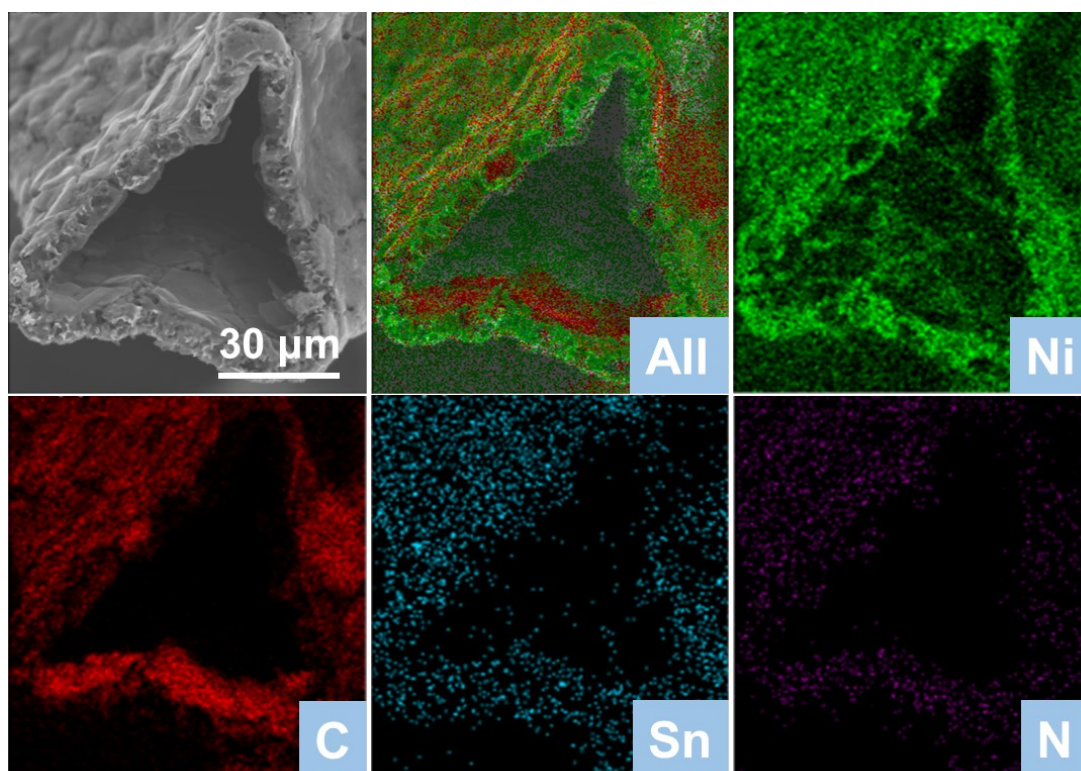

**Fig. S5.** Cross-section elemental mapping images of the as-prepared DLCTs. It reveals that the Sn-containing and N-doped carbon tubes covered uniformly on the NF surface in the as-prepared DLCTs.

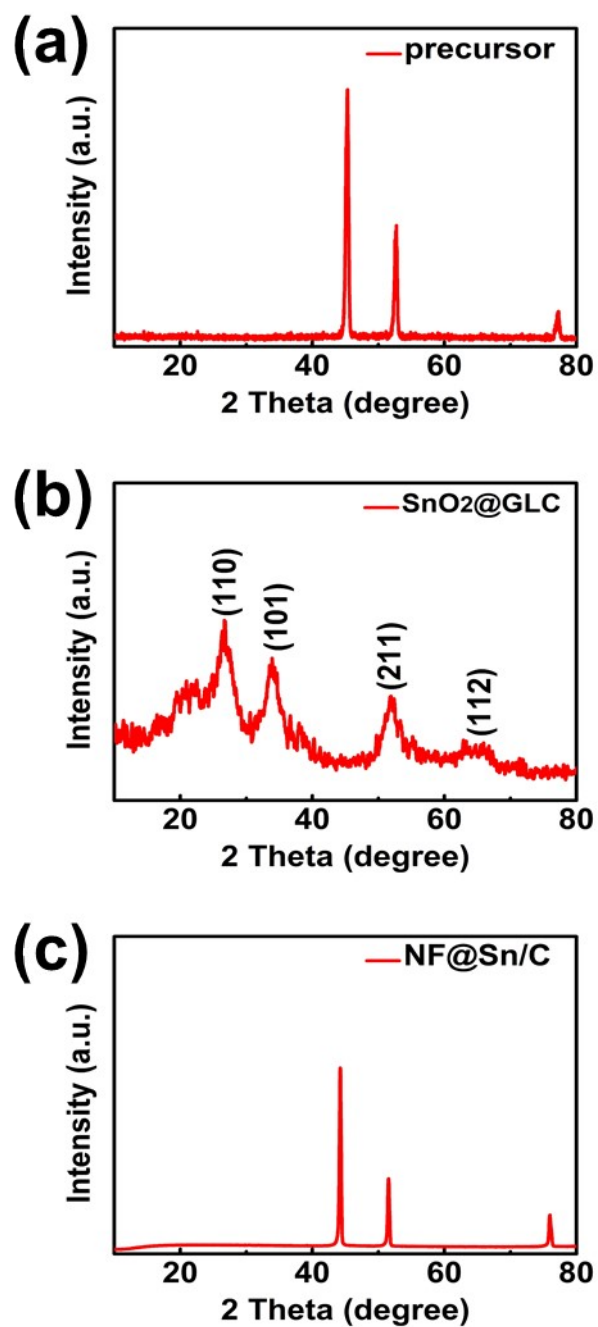

**Fig. S6.** XRD patterns of (a) the precursor, (b) SnO<sub>2</sub>@GLC and (c) NF@Sn/C. Notably, three obvious peaks located at 45.3°, 52.7° and 77.3° are ascribed to the metallic Ni (**Fig. S6a**), and four peaks located at 26.8°, 33.9°, 51.9° and 64.7° could be attributed to SnO<sub>2</sub> (**Fig. S6b**).

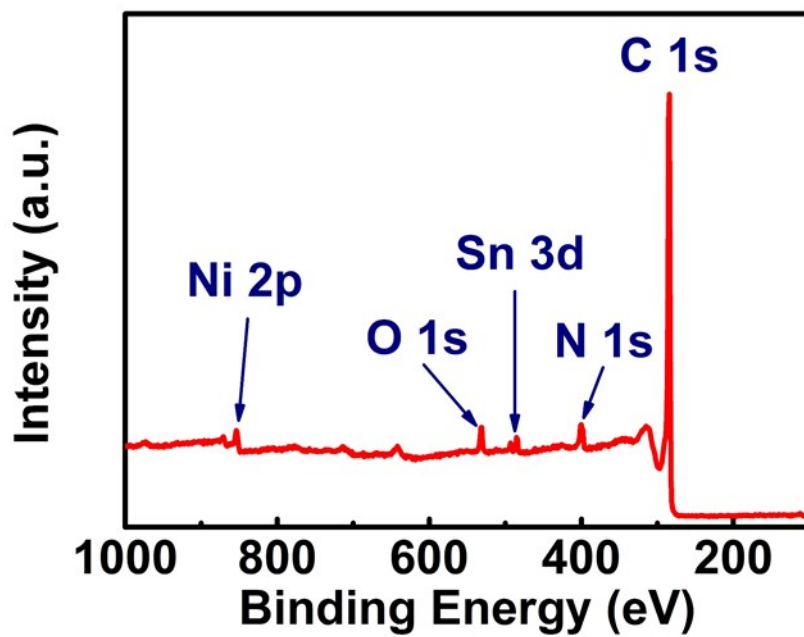

**Fig. S7.** XPS spectra of the DLCTs. There are five types of elements to investigate the surface characterization in the XPS spectra, namely C, Ni, Sn, N, and O respectively.



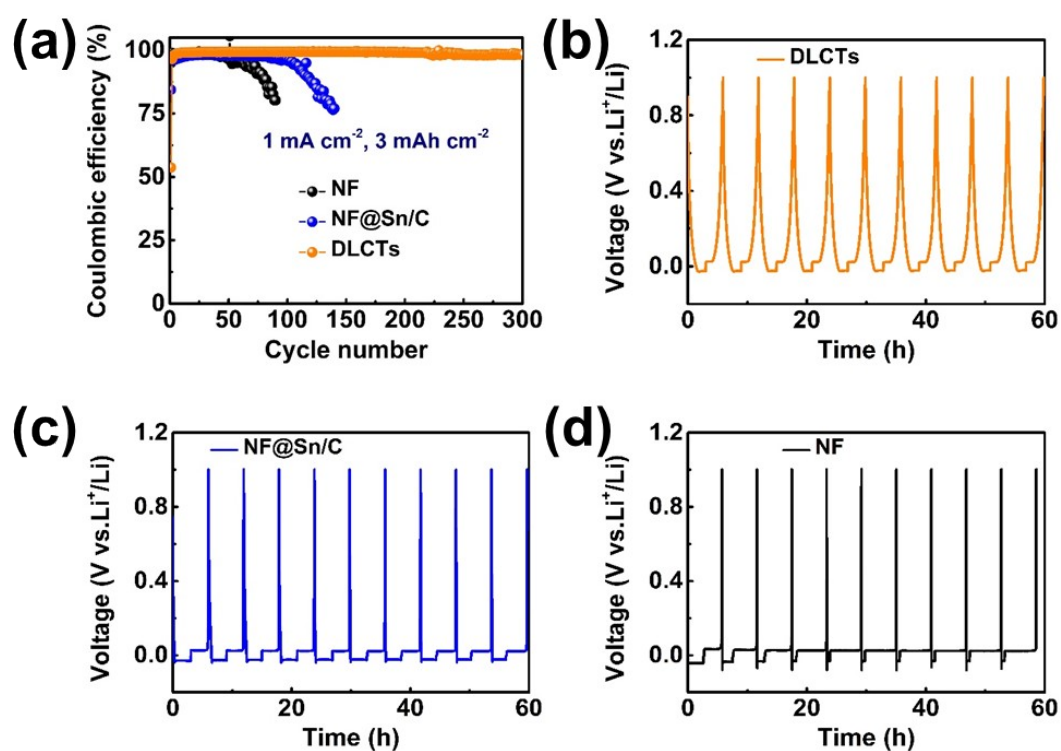

**Fig. S8.** (a) Coulombic efficiency profiles of NF, NF@Sn/C and DLCTs at a fixed current density of  $1 \text{ mA cm}^{-2}$  with an areal capacity of  $3 \text{ mAh cm}^{-2}$ , and the corresponding voltage-time profiles of (b) DLCTs, (c) NF@Sn/C and (d) NF.

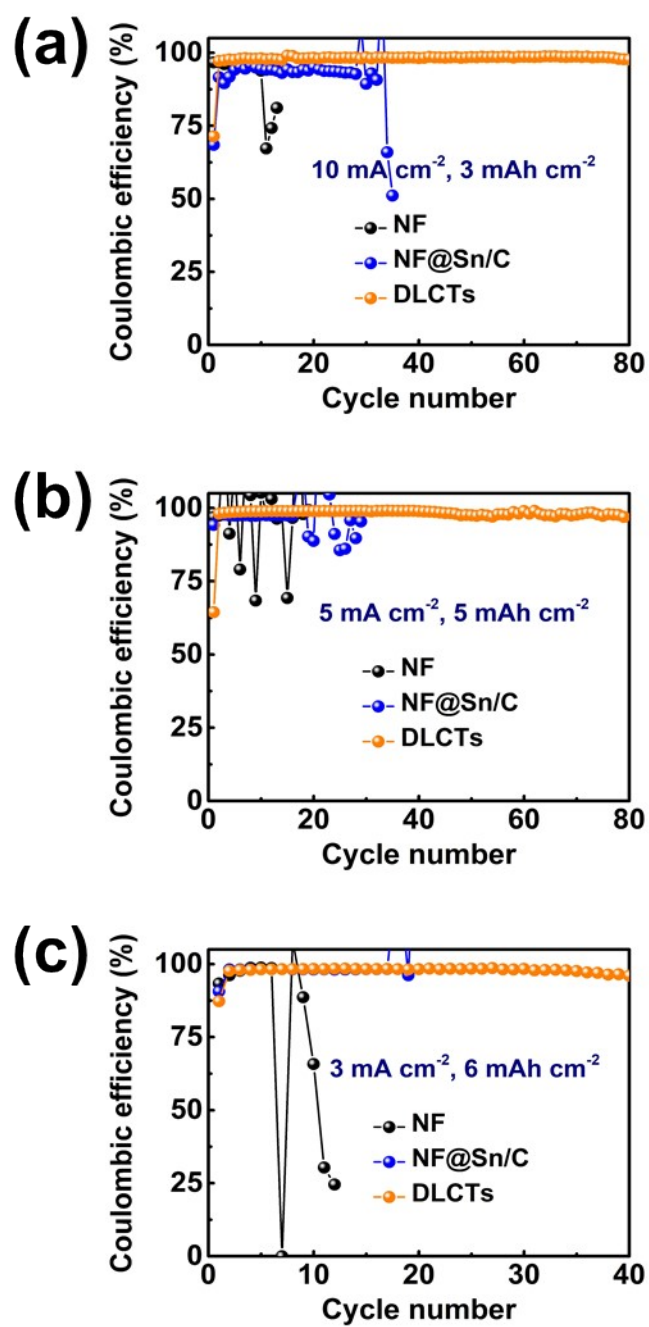

**Fig. S9.** Coulombic efficiencies of NF, NF@Sn/C and DLCTs: (a) 10 mA cm<sup>-2</sup> with 3 mAh cm<sup>-2</sup>, (b) 5 mA cm<sup>-2</sup> with 5 mAh cm<sup>-2</sup> and (c) 3 mA cm<sup>-2</sup> with 6 mAh cm<sup>-2</sup>.

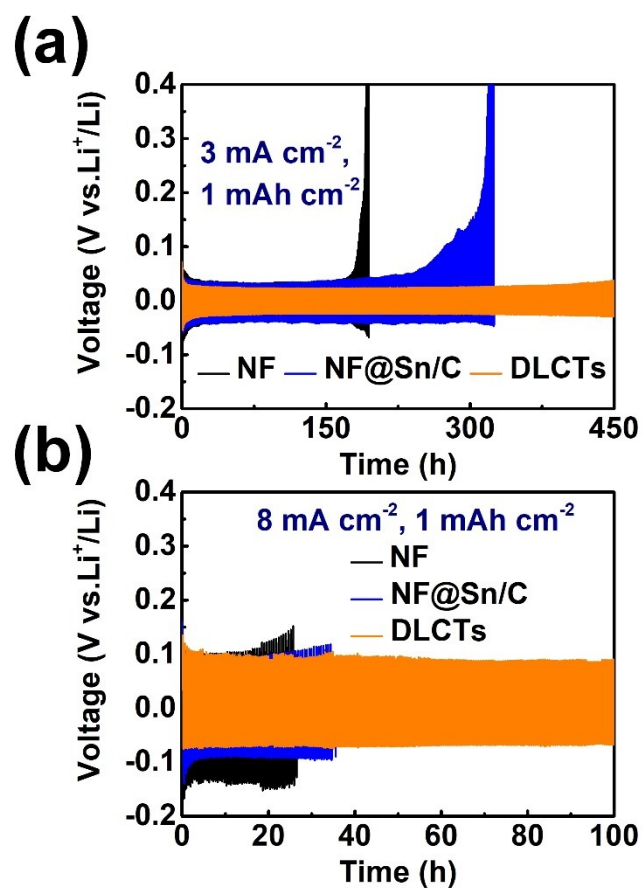

**Fig. S10.** Voltage-time profiles of NF, NF@Sn/C and DLCTs: (a) 3 mA cm<sup>-2</sup> with 1 mAh cm<sup>-2</sup> and (b) 8 mA cm<sup>-2</sup> with 1 mAh cm<sup>-2</sup>.

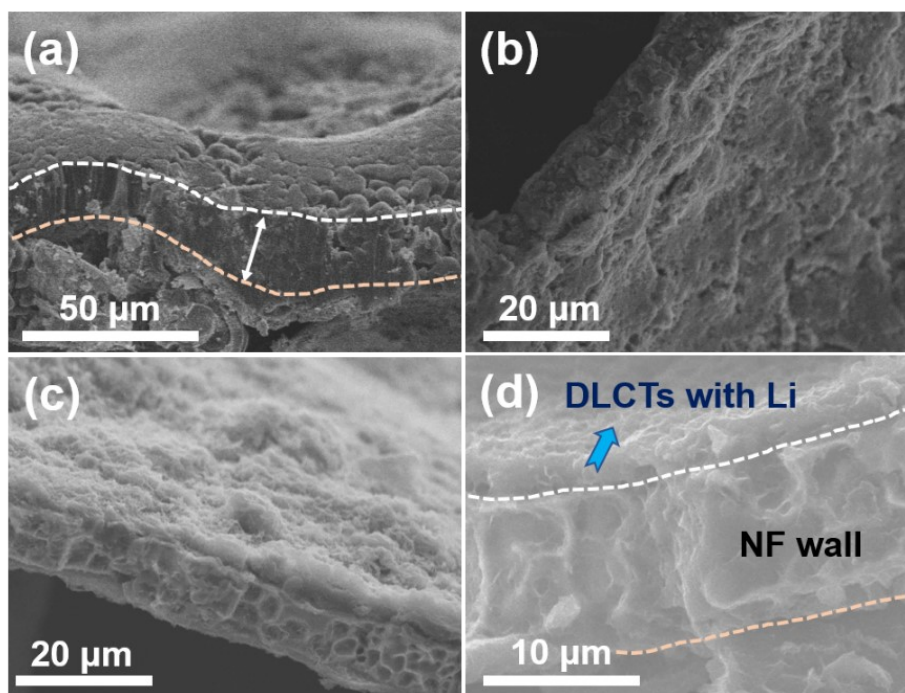

**Fig. S11.** (a) SEM images of DLCTs loaded with the Li metal of  $10 \text{ mAh cm}^{-2}$ . SEM images of DLCTs@Li electrode after (b) 25 and (c-d) 50 cycles at  $5 \text{ mA cm}^{-2}$  with  $5 \text{ mAh cm}^{-2}$ .

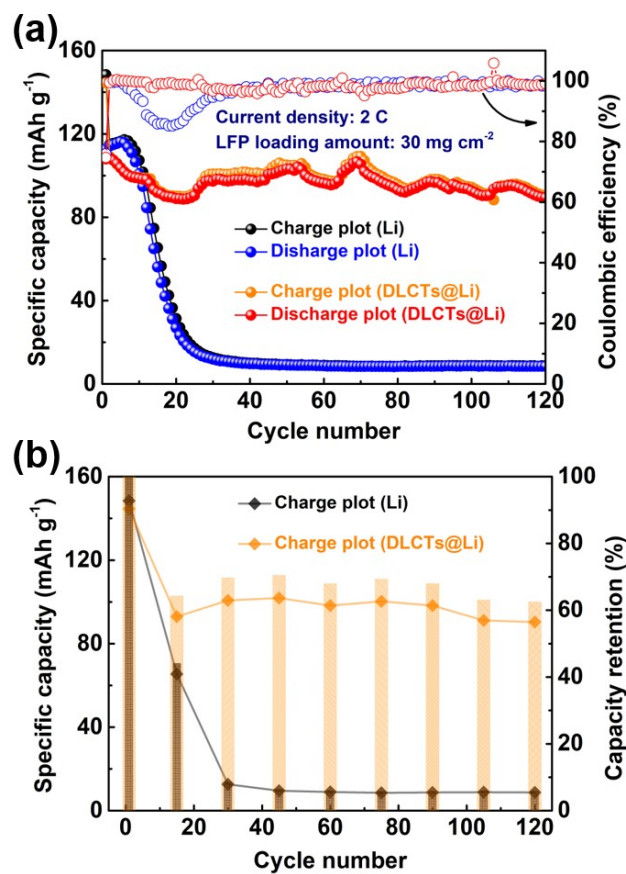

**Fig. S12.** (a) Electrochemical performances of full cells with high LiFePO<sub>4</sub> loading of 30 mg cm<sup>-2</sup> at the current density of 2 C. (b) Related plots of specific capacity and capacity retention at various cycles.

**Table S1** Electrochemical properties comparison of DLCTs and relative three-dimensional porous frameworks obtained by modifying Ni foam (NF) or Cu foam (CF).

| <b>Materials</b>      | <b>Current density</b>      | <b>Areal capacity</b>        | <b>Lifetime (h)</b> | <b>Ref.</b> |
|-----------------------|-----------------------------|------------------------------|---------------------|-------------|
| Li-Zn@CF              | 1 mA cm <sup>-2</sup>       | 1 mAh cm <sup>-2</sup>       | 430                 | 1           |
| LNCO/Ni               | 1 mA cm <sup>-2</sup>       | 1 mAh cm <sup>-2</sup>       | 1000                | 2           |
| NCNT/NF               | 1 mA cm <sup>-2</sup>       | 1 mAh cm <sup>-2</sup>       | 1000                | 3           |
| CNF@NF                | 1 mA cm <sup>-2</sup>       | 1 mAh cm <sup>-2</sup>       | 300                 | 4           |
| Au/Cu@FCu             | 1 mA cm <sup>-2</sup>       | 1 mAh cm <sup>-2</sup>       | 970                 | 5           |
| ZMNF                  | 2 mA cm <sup>-2</sup>       | 2 mAh cm <sup>-2</sup>       | 800                 | 6           |
| CONF                  | 2 mA cm <sup>-2</sup>       | 2 mAh cm <sup>-2</sup>       | 167                 | 7           |
| NiO@NF                | 1 mA cm <sup>-2</sup>       | 1 mAh cm <sup>-2</sup>       | 600                 | 8           |
| AuLi <sub>3</sub> @NF | 0.5 mA cm <sup>-2</sup>     | 1 mAh cm <sup>-2</sup>       | 740                 | 9           |
| <b>This work</b>      | <b>2 mA cm<sup>-2</sup></b> | <b>2 mAh cm<sup>-2</sup></b> | <b>1200</b>         |             |
|                       | <b>5 mA cm<sup>-2</sup></b> | <b>5 mAh cm<sup>-2</sup></b> | <b>200</b>          |             |

### References for Table S1

- 1 Y. Ye, Y. T. Liu, J. L. Wu, Y. F. Yang, *J. Power Sources*, 2020, **472**, 228520.
- 2 X. Huang, X. Y. Feng, B. Zhang, L. Zhang, S. C. Zhang, B. Gao, P. K. Chu, K. F. Huo, *ACS Appl. Mater. Interfaces*, 2019, **11**, 31824-31831.
- 3 Z. Zhang, J. L. Wang, X. F. Yan, S. L. Zhang, W. T. Yang, Z. H. Zhuang, W. Q. Han, *Energy Storage Mater.*, 2020, **29**, 332-340.
- 4 Z. P. Zeng, W. Li, X. J. Chen, X. B. Liu, *Adv. Funct. Mater.*, 2020, **30**, 2004650.
- 5 N. Luo, G. J. Ji, H. F. Wang, F. Li, Q. C. Liu, J. J. Xu, *ACS Nano*, 2020, **14**, 3281-3289.
- 6 C. Z. Sun, Y. P. Li, J. Jin, J. H. Yang, Z. Y. Wen, *J. Mater. Chem. A*, 2019, **7**, 7752-7759.

- 7 X. Y. Yue, W. W. Wang, Q. C. Wang, J. K. Meng, Z. Q. Zhang, X. J. Wu, X. Q. Yang, Y. N. Zhou, *Energy Storage Mater.*, 2018, **14**, 335-344.
- 8 Y. Ma, Y. X. Jing, Y. T. Gu, P. W. Qi, Y. B. Lian, C. Yang, A. A. Razzaq, X. H. Zhao, Y. Peng, X. Q. Zeng, J. S. Li, Z. Deng, *ACS Appl. Mater. Interfaces*, 2020, **12**, 9355-9364.
- 9 X. Ke, Y. H. Liang, L. H. Ou, H. D. Liu, Y. M. Chen, W. L. Wu, Y. F. Cheng, Z. P. Guo, Y. Q. Lai, P. Liu, Z. Shi, *Energy Storage Mater.*, 2019, **23**, 547-555.
